# Supplementary material for: Hormonal and psychological influences on performance anxiety in adolescent female volleyball players: a multi-approach study
Source: PeerJ. 2024 Feb 19;12:e16617. doi: 10.7717/peerj.16617 (PMC10883150; doi:10.7717/peerj.16617)
Supplement: Supplemental Information 1 — The data shows all the values taken into account in the article in two different colours: yellow for losers (P) and green for winners (V). However, the Pre and Post measurements are specified. [file peerj-12-16617-s001.xlsx]

## Sheet: Sheet1
Shirt number	Final result of competition	Cortisol Pre nmol/L	Cortisol Post nmol/L	Progesterone Pre pmol/L	Progesterone Post pmol/L	Menstrual cycle	Amylase Pre	Amylase Post	Amylase activity - Pre	Amylase activity - Post	Somatic Items	Worry Items	Concentration Disruption items	Final score (performance anxiety)	Relationship with team	BDNF	DAT1
2	W	27.4068	16.6152	240.122	218.212	Yes	7275	8293	283	425	11	8	5	24	7	2	3
4	W	18.9336	15.18	887.888	1015.18	Yes	5257	7861	462	249	7	8	5	20	7	2	3
5	W	18.5748	6.5688	274.72	265.562	Yes	7750	5498	29	29	8	9	7	24	7	1	3
6	W	22.08	17.7192	925.38	917.525	Yes	1615	2014	220	223	7	10	6	23	7	1	3
7	W	19.8168	8.3904	1875.47	867.663	Yes	5548	6437	397	387	7	9	7	23	7	1	1
10	W	25.1712	12.2544	937.146	917.43	Yes	1626	2695	500	337	8	10	5	23	6	1	2
13	L	20.976	28.2072	915.84	940.835	Yes	5962	5234	510	308	9	16	11	36	6	1	1
14	L	20.976	22.632	913.423	1863.16	Yes	4851	3622	519	374	12	18	9	39	5	2	2
15	L	24.288	15.456	241.267	210.675	Yes	6338	7237	324	270	8	9	9	26	5	2	1
16	L	21.3072	13.3032	945.128	882.514	Yes	6174	6271	454	189	8	15	10	33	6	1	3
17	L	23.3772	20.6172	941.789	1093.92	Yes	4808	7535	851	650	6	10	7	23	5	1	3
18	L	24.6468	18.354	988.249	975.465	Yes	4906	5199	194	119	11	6	7	24	6	2	3
19	L	19.872	15.87	941.789	846.802	Yes	3183	6671	313	119	11	10	9	30	7	1	2
20	L	22.08	6.9	908.081	263.336	Yes	4677	3309	233	218	7	13	6	26	7	1	2
21	L	17.4984	23.046	841.396	1844.4	Yes	3324	1997	609	262	11	14	9	34	4	2	1
22	W	20.5344	19.32	954	955.24	Yes	1712	2303	951	720	5	8	7	20	6	1	2
23	W	17.664	3.0636	823.207	704.656	Yes	4109	8466	99	322	12	13	7	32	7	1	2
24	W	17.4984	7.728	542.317	932.344	Yes	4474	6031	33	86	11	13	10	34	7	1	2
25	W	22.08	7.2864	924.267	862.289	Yes	3895	6932	456	174	11	12	10	33	7	3	3
26	W	24.6192	24.012	886.52	895.965	Yes	6339	7963	221	303	9	16	7	32	7	1	3
	W - Winner
	L - Loser															BDNF
																GG	1
																AG	2
																AA	3
																DAT1
																09.09	1
																09.10	2
																10.10	3
